# Supplementary material for: HER2 inhibition efficiency of 6-amino-2-methyl-2-phenethyl-2H-benzopyran and feasibility of the 64Cu-labeled benzopyran derivative in cancer diagnosis
Source: Royal Society of Chemistry journal article supplement (doi:10.1039/c9nj02893e), 2019-01-01
Supplement: c9nj02893e1.pdf [file c9nj02893e1.pdf]

## **Supplementary Data: Experimental, characterization and results**

### **HER2 inhibition efficiency of 6-amino-2-methyl-2-phenethyl-2H-benzopyran and feasibility of radioactive $^{64}\text{Cu}$ -labeled benzopyran derivative in cancer diagnosis**

Soonjae Jung<sup>a</sup>, J.R. Anusha<sup>b,d</sup>, Seungil Park<sup>b</sup>, Kook Hyun Yu<sup>b</sup>, C. Justin Raj<sup>b</sup>, Byung Chul Kim<sup>c\*</sup>

<sup>a</sup>Division of Applied RI, Korea Institute of Radiological & Medical Sciences, Seoul-01812, Republic of Korea.

<sup>b</sup>Department of Chemistry, Dongguk University, Jung-gu, Seoul-04620, Republic of Korea.

<sup>c</sup>Department of Printed Electronics Engineering, Suncheon National University, 255, Jungang-ro, Suncheon-si, Jellanamdo, 57922, Republic of Korea.

<sup>d</sup>Department of Advanced Zoology and Biotechnology, Loyola College, Chennai-600034, India.

#### **1. Synthesis of Compound 1**

The 6-amino-2-methyl-2-phenethyl-2H-benzopyran (compound 4) was synthesized using 2-Hydroxy-5-nitroacetophenone as a starting compound and it (1.24 g, 6.8 mmol) was dissolved in 10 mL of toluene with the subsequent addition of 150  $\mu\text{L}$  (1.8 mmol) pyrrolidine. Then, 1 mL (6.6 mmol) of benzyl acetone was slowly added to the solution under constant stirring for 10 min and refluxed for 6 h. The resultant mixture was cooled to room temperature and extracted three times with 30 mL of distilled water and ethyl acetate (EtOAc). The separated organic layer was collected, washed with brine, dried over anhydrous  $\text{MgSO}_4$  and distilled under reduced pressure. Furthermore, the mixture was purified by column chromatography (EtOAc: Hexane = 1: 5, v / v, Rf = 0.23) and obtained 0.94 g (3.0 mmol) to attain a pale-yellow oil, 2-methyl-6-nitro-2-phenethylbenzopyran-4-one (Compound 1) with the yield of 46 %.

The characterization of the Compound 1 revealed,  $\rho$  1.4 (density); LC-MS m/z 312, (M+H)<sup>+</sup>;  $\text{C}_{18}\text{H}_{18}\text{NO}_4$  312.34 (calculated) and 312.2 (observed);  $^1\text{H-NMR}$  (500 MHz,  $\text{DMSO-d}_6$ ):  $\delta$  8.48 (d,  $J$  = 2.9 Hz, 1H), 8.39 (dd,  $J$  = 9.1, 2.9 Hz, 1H), 7.27 (m, 3H), 7.19 (m, 3H), 3.11 (d,  $J$  = 16.7 Hz, 1H), 2.95 (d,  $J$  = 16.7 Hz, 1H), 2.75 (m, 2H), 2.05 (m, 2H), 1.48 (s, 3H);  $^{13}\text{C NMR}$  (125 MHz,  $\text{DMSO-d}_6$ ):  $\delta$  191.24, 164.1, 141.7, 141.5, 131.1, 128.9, 128.7, 126.4, 122.4, 120.4, 119.9, 83.9, 46.5, 40.8, 29.6, 23.7.

#### **2. Synthesis of Compound 2**

Compound 1 (0.94 g, 3.0 mmol) was dissolved in 15 mL of tetrahydrofuran and 15 mL of methanol.  $\text{NaBH}_4$  (0.20 g, 5.1 mmol) was slowly added with the subsequent intervals and stirred for 1 h at 10 °C. Then, it was extracted 3 times with 30 mL of distilled water and EtOAc. The separated organic layer was collected, washed with brine, dried over anhydrous  $\text{MgSO}_4$ , filtered and distilled under reduced pressure. The mixture was purified by column chromatography (EtOAc: Hexane = 1: 5, v / v, Rf = 0.25) to yield 97 % of 2-methyl-6-nitro-2-phenethylbenzopyran-4-ol (Compound 2) (0.93 g, 2.9 mmol).

The characterization showed,  $\rho$  1.4(density); LC-MS m/z 314, (M+H)<sup>+</sup>;  $\text{C}_{18}\text{H}_{20}\text{NO}_4$  314.36 (calculated) and 314.2. (observed);  $^1\text{H-NMR}$  (500 MHz,  $\text{DMSO-d}_6$ ):  $\delta$  8.36 (m, 1H), 8.04 (m, 1H), 7.27 (m, 2H), 7.18 (m, 2H), 6.94 (dd,  $J$  = 10.3, 9.1 Hz, 1H), 5.83 (dd,  $J$  = 30.1, 6.0 Hz, 1H), 4.81 (m, 1H), 2.25 (m, 1H), 2.00 (m, 1H), 1.86 (m, 2H), 1.42 (s, 3H);  $^{13}\text{C NMR}$  (125 MHz,  $\text{DMSO-d}_6$ ):  $\delta$  159.2, 142.3, 140.8, 128.8, 128.7, 127.8, 127.6, 126.3, 124.9, 124.8, 124.6, 118.0, 80.4, 61.2, 43.4, 29.9, 26.2, 24.2.

#### **3. Synthesis of Compound 3**

Compound 3 was synthesized by dissolving 0.94 g (2.9 mmol) of 2-methyl-6-nitro-2-phenethylbenzopyran-4-ol (compound 2) with 10 mL of  $\text{CH}_2\text{Cl}_2$  and 1.0 mL (6.0 mmol) of N, N-diisopropylethylamine (DIPEA) and stirred for 5 min. Then, 465  $\mu\text{L}$  (6.0 mmol) of methanesulfonyl chloride was slowly added and stirred under room temperature for 8 h. After this, the mixture was extracted three times with 100 mL of 1 N HCl and 30 mL of  $\text{CH}_2\text{Cl}_2$ . The

separated organic layers were combined, dried over anhydrous  $\text{MgSO}_4$ , filtered and distilled under reduced pressure. Then the obtained mixture was dissolved in 10 mL of toluene and 540  $\mu\text{L}$  (3.6 mmol) of 1,8-diazabicyclo [5.4.0] undec-7-ene (DBU) was added slowly and refluxed for 16 h. The resultant mixture was cooled to room temperature and extracted three times with 30 mL of distilled water and 30 mL of EtOAc. The organic layer was collected, washed with brine, dried over anhydrous  $\text{MgSO}_4$ , filtered and distilled under reduced pressure. The mixture was purified by column chromatography (EtOAc: Hexane = 1: 4, v/v,  $R_f$  = 0.21) and obtained 69 % of 2-methyl-6-nitro-2-phenethyl-2H- benzopyran (compound 3).

Moreover, the characterization of compound 3 depicted  $\rho$  1.3 (density); LC-MS  $m/z$  296, (M+H)<sup>+</sup>;  $\text{C}_{18}\text{H}_{18}\text{NO}_3$  296.34 (calculated) and 296.2 (observed);  $^1\text{H-NMR}$  (500 MHz,  $\text{DMSO-d}_6$ ):  $\delta$  8.07 (m, 1H), 8.02 (d,  $J$  = 9.0 Hz, 1H), 7.26 (t,  $J$  = 7.4 Hz, 2H), 7.18 (dd,  $J$  = 15.0, 7.4 Hz, 3H), 6.94 (d,  $J$  = 8.9 Hz, 1H), 6.69 (d,  $J$  = 10.1 Hz, 1H), 6.00 (d,  $J$  = 10.1 Hz, 1H), 2.68 (t,  $J$  = 8.5 Hz, 2H), 2.01 (m, 2H), 1.47 (s, 3H);  $^{13}\text{C NMR}$  (125 MHz,  $\text{DMSO-d}_6$ ):  $\delta$  159.1, 141.9, 141.3, 131.9, 128.8, 128.7, 126.3, 125.7, 122.5, 121.6, 121.8, 116.8, 81.4, 43.2, 30.2, 27.4.

#### 4. Synthesis of Compound 4

Finally, compound 4 was synthesized by dissolving 0.60 g (2.0 mmol) of 2-methyl-6-nitro-2-phenethyl-2H-benzopyran in 5 mL of EtOAc, and 10 % Pd/C (0.1 g, 0.1 mmol) was slowly added to the solution. The reaction mixture was stirred at room temperature under of  $\text{H}_2$  atmosphere for 20 h. After completion of the reaction, the reaction mixture was filtered and distilled under reduced pressure. The resultant mixture was purified by column chromatography (EtOAc: Hexane = 1: 4, v / v,  $R_f$  = 0.21) to yield 95% of 6-amino-2-methyl-2-phenethyl-2H-benzopyran (compound 4) (0.50 g, 1.9 mmol).

Here, the characterization showed  $\rho$  1.6 (density); LC-MS  $m/z$  266, (M+H)<sup>+</sup>;  $\text{C}_{18}\text{H}_{20}\text{NO}$  266.36 (calculated) and 266.2 (observed);  $^1\text{H-NMR}$  (500 MHz,  $\text{DMSO-d}_6$ ):  $\delta$  7.26 (m, 3H), 7.17 (m, 4H), 6.51 (d,  $J$  = 8.4 Hz, 1H), 6.37-6.30 (m, 2H), 5.73 (d,  $J$  = 9.8 Hz, 1H), 2.66 (m, 2H), 1.87 (m, 2H), 1.35 (s, 3H);  $^{13}\text{C NMR}$  (125 MHz,  $\text{DMSO-d}_6$ ):  $\delta$  143.9, 142.8, 142.6, 130.9, 128.8, 128.6, 126.1, 123.6, 121.7, 116.4, 115.1, 112.4, 77.4, 42.5, 30.3, 25.9.

#### 5. Synthesis of NOTA-Bn-SCN-2-methyl-2-phenethyl-2H-benzopyran (NOTA-Bn-SCN-Bzpyran, compound 5)

Compound 5 was synthesized by dissolving ~30 mg (0.11 mmol) of 6-amino-2-methyl-2-phenethylbenzopyran and 50 mg (0.09 mmol) of p-SCN-Bn-NOTA in 1 mL of  $\text{CHCl}_3$  and 45  $\mu\text{L}$  (0.27 mmol) of triethylamine was added into the mixture. After stirring for 24 h at room temperature, a semi-preparative HPLC column (C18, 5  $\mu\text{m}$ , 250  $\times$  10.0 mm, 0.1% TFA in water: 0.1% TFA in ACN = 55:45, 254 nm,  $R_t$  = 37.8 min) to give 57 mg (0.08 g) of pale yellow solid precursor NOTA-Bn-SCN-2-methyl-2-phenethyl- 2H-benzopyran was synthesized with the yield of 89%.

Characterization: 180-182  $^\circ\text{C}$ ; LC-MS  $m/z$  716, (M+H)<sup>+</sup>;  $\text{C}_{38}\text{H}_{45}\text{N}_5\text{O}_7\text{S}$  716.87 (calculated) and 716.1 (observed);  $^1\text{H NMR}$  (500 MHz,  $\text{DMSO-d}_6$ ):  $\delta$  7.44 (d,  $J$  = 8.1 Hz, 2H), 7.40 (d,  $J$  = 8.4 Hz, 1H), 7.27 (m, 3H), 7.19 (m, 3H), 7.11 (d,  $J$  = 7.3 Hz, 2H), 6.75 (d,  $J$  = 9.1 Hz, 1H), 6.49 (d,  $J$  = 10.0 Hz, 1H), 5.82 (d,  $J$  = 9.9 Hz, 1H), 3.86-3.75 (br, 3H), 3.18-2.92 (br, 6H), 2.87-2.62 (br, 4H), 2.10-2.05 (m, 8H), 1.97-1.90 (m, 2H), 1.39 (s, 3H);  $^{13}\text{C NMR}$  (125 MHz,  $\text{DMSO-d}_6$ ):  $\delta$  179.5, 177.0, 172.7, 149.8, 142.0, 137.4, 134.8, 131.0, 129.1, 128.9, 128.8, 128.7, 127.6, 125.0, 124.9, 123.6, 122.0, 121.2, 115.9, 77.5, 68.9, 63.5, 63.1, 62.8, 62.0, 58.3, 58.1, 55.7, 42.4, 40.4, 30.3, 25.9.

#### 6. Synthesis of Cu-NOTA-Bn-SCN-2-methyl-2-phenethyl- 2H-benzopyran (Cu-6)

To synthesis Cu-6, ~11g (80  $\mu\text{mol}$ ) of  $\text{CuCl}_2$  was dissolved in 10 mL of distilled water to prepare a stock solution. Then, 2.9 mg (4.0  $\mu\text{mol}$ ) of compound 5 and 500  $\mu\text{L}$  (4.0  $\mu\text{mol}$ , 1 eq) of  $\text{CuCl}_2$  stock solution were added to the reaction vessel and the pH of the reaction mixture was adjusted to 5.1 using 5 % ammonium citrate buffer. After completion of the reaction, a semi-preparative HPLC column (C18, 5  $\mu\text{m}$ , 250  $\times$  10.0 mm, 0.1% TFA in water: 0.1% TFA in ACN = 55: 45 (v / v)  $R_t$  = 20.0 min) to obtain 2.3 mg of the reference substance Cu-NOTA-Bn-SCN-2-methyl-2-phenethyl- 2H-benzopyran (Cu-NOTA-Bn-SCN-Bzpyran) (3.0  $\mu\text{mol}$ ) with a yield of 75%.

Characterization: m.p. 193-195  $^\circ\text{C}$ ; LC-MS  $m/z$  777, (M+H)<sup>+</sup>;  $\text{C}_{38}\text{H}_{43}\text{buN}_5\text{O}_7\text{S}$  777.39 (calculated) and 777.3 (observed);  $^1\text{H-NMR}$ (500 MHz,  $\text{DMSO-d}_6$ ):  $\delta$  7.46 (d,  $J$  = 8.4 Hz, 2H), 7.41 (d,  $J$  = 8.4 Hz, 1H), 7.27 (m, 3H), 7.19 (m,

3H), 7.11 (d,  $J = 7.4$  Hz, 2H), 6.76 (d,  $J = 8.7$  Hz, 1H), 6.49 (d,  $J = 9.9$  Hz, 1H), 5.82 (d,  $J = 9.9$  Hz, 1H), 3.83-3.55 (br, 3H), 2.85-2.64 (br, 10H), 2.37 (br, 2H), 1.98-1.89 (m, 4H), 1.80-1.70 (br, 2H), 1.43-1.37 (br, 2H), 1.24 (s, 3H);  $^{13}\text{C}$  NMR (125 MHz, DMSO- $d_6$ ):  $\delta$  179.5, 179.9, 149.8, 141.7, 136.9, 135.0, 130.9, 129.2, 128.9, 128.8, 128.7, 127.6, 125.4, 124.9, 123.6, 122.2, 121.1, 116.0, 77.4, 55.2, 45.4, 44.0, 42.5, 41.3, 40.1, 42.6, 39.0, 30.2, 26.0.

## 7. Synthesis of $^{64}\text{Cu}$ -6

[ $^{64}\text{Cu}$ ]  $\text{CuCl}_2$  produced from the 50 MeV cyclotron at the Korea Institute of Radiological & Medical Sciences was measured using a gamma counter.  $^{64}\text{Cu}$  185 ~ 259 MBq of HCl was completely removed by heating at 80 °C and injecting nitrogen gas into the reaction vessel. Then, 300  $\mu\text{L}$  of 5% ammonium citrate buffer (pH 5.1) was added and 35  $\mu\text{g}$  (50 nmol) of Compound 5 was added and allowed to react at room temperature for 1 h to obtain  $^{64}\text{Cu}$ -6. The  $^{64}\text{Cu}$  labelled compound was confirmed by a radio-TLC scanner, and the reaction mixture was separated by solid-phase extraction (SPE, Sep-Pak<sup>®</sup> Plus Silica cartridge, Waters). The radiochemical yield of  $^{64}\text{Cu}$ -6 was 90 %, the radiochemical purity was ~98%, and the specific activity was found to be 3.7 GBq/ $\mu\text{mol}$ .

## 8. Cytotoxicity studies

The anti-cancer effect of compound **4** on HER2-positive breast cancer was investigated utilizing the human breast cancer cell line SK-BR-3. SK-BR-3 cells were cultured in 500 mL of RPMI 1640 medium supplemented with 50 mL of FBS (10% v / v) and 5 mL p/s (1% v/v) RTI. Nearly 26.5 mg (100  $\mu\text{mol}$ ) of Compound **4** was dissolved in 1 mL of DMSO (for biology) to prepare a stock solution and it was diluted in the medium. The culture was maintained in a humidified incubator (37 °C) containing 5%  $\text{CO}_2$ . Meanwhile, other samples such as flavones (FLV), genistein (GST), 6-aminoflavone (FLVN), and compound **1** were also analyzed along with Compound **4**. The SK-BR-3 cell line was dispensed into each well at a concentration of  $1 \times 10^4$  cells / well in a 96-well plate, and the cells were stabilized for one day to adhere to the plate bottom. Each well was washed twice with 100  $\mu\text{L}$  of PBS and treated with 200  $\mu\text{L}$  of compound **4** at concentrations of 0 (DMSO 1: 1000), 1, 2, 5, 10, 20, 50, 80 and 100  $\mu\text{M}$ . After incubation for 48 h, each well was washed twice with 100  $\mu\text{L}$  of PBS and was treated with 100  $\mu\text{L}$  of 10% EZ cytox and incubated for 4 h in the incubator. Then the cell proliferation was measured at 450 nm using a PerkinElmer VICTOR X4 Multimode Plate Reader instrument.

## 9. Soft-agar assay

A soft agar assay test was performed to investigate the adhesion-independent colony formation of SK-BR-3 cell line. The agarose (0.6 g) was dissolved in 25 mL of distilled water to make 2.4 % stock solution, which was then sterilized and cooled to 37 °C. Both 1.5 mL of stock agar solution and 4.5 mL of medium were mixed to form a 0.6 % base agarose layer, and 1 mL of each was dispensed into 6 wells, and the mixture was solidified at 4 °C for 5 min. A top agarose layer of 0.3 % was prepared by mixing 750  $\mu\text{L}$  stock agar solution and 5 mL of SK-BR-3 cells ( $1.2 \times 10^4$  cells / mL), and then 1 mL each was dispensed on the base layer ( $10^4$  cells / well). After hardening at 4 °C for 5 min, the control group was treated with 1 mL of medium, and the comparative group was treated with 1 mL of 20  $\mu\text{M}$  compound **4**. The culture medium was changed every 3 to 4 days (control group: 1 mL of medium, 1 mL of 20  $\mu\text{M}$  compound **4** in the comparison group), and cultured for 14 days at 37 °C in an incubator. After the formation of the colonies, nitrotetrazolium blue chloride (NBT, 0.5 mg NBT in 1 mL PBS) was stained in each well and stained for microscopic colonization.

## 10. Western Blotting

For the Western blotting test, the SK-BR-3 cell line was sub-cultured in 100 mm culture plate at a concentration of  $6 \times 10^5$  cells/plate and stabilized for a day. After stabilization, each plate was washed twice with 10 mL of PBS and the plate was treated with 10 mL of 0 (DMSO 1: 1000), 10, 20 and 50  $\mu\text{M}$  of compound **4**, respectively. After incubation for 48 h in the incubator, the cells were collected in Eppendorf tubes and centrifuged at 14,000 rpm for 30 s, and the supernatant was removed. Then RIPA buffer (200  $\mu\text{L}$ ) was added to each cell pellet, reacted at 4 °C for 1 h and the supernatant was collected by centrifugation at 10,000 rpm for 10 min. The proteins in the supernatant were quantified with Bradford (Bio-Rad Protein Assay Kit) reagent to make 200  $\mu\text{L}$  of 2.5 mg/mL protein. 20  $\mu\text{L}$  (50  $\mu\text{g}$ ) of each protein was treated with sodium dodecyl sulfate (SDS) gel and separated by SDS-

polyacrylamide gel electrophoresis (PAGE, at 160 V, 1 h). Gel proteins were transferred to polyvinylidene difluoride (PVDF) membrane by electrophoresis (90 V, 90 min). The membranes were treated with 10 mL of 5% skim milk (Skim milk 0.5 g in 10 mL TBS-T buffer) for blocking the non-specific binding of the antibody. 10 mL of 1% primary antibody was applied to the membrane and maintained over-night at 4 °C. After washing 3 times with 10 mL of TBS-T solution, 10 mL of 0.2% secondary antibody was treated and reacted at room temperature for 1 h. Then, the cells were reacted in 1 mL of electrochemiluminescence (ECL, Pierce Biotechnology) detection solution for 1 min and the proteins were identified on X-ray films.

### 11. Studies on Cellular uptake of <sup>64</sup>Cu-6

The cellular uptake of <sup>64</sup>Cu-6 was performed on SK-BR-3, BT-474 and MDA-MB-231 cell lines. The cells were placed in a 24 well plate with 1.0 x 10<sup>5</sup> cells per well and treated with <sup>64</sup>Cu-6. After incubation at 37°C for 24 h, the supernatant was removed and the cells were washed by PBS to remove surface-bound radioactivity materials. Then, the cells were suspended in 0.1% SDS in PBS and the radioactivity of the supernatant and cells were determined by a gamma counter. The experiments of cell viability and cell uptake were carried out in triplicate.

### 12. Structural Stability of <sup>64</sup>Cu-6

Structural stability of the labelled compounds was evaluated using the human serum at 0.5, 1, 2, 4, 16, and 24 h respectively. After incubation, the cells were incubated at 37 ° C with a radio-TLC scanner. <sup>64</sup>Cu-6 of 3.7 MBq/ml was added to 1 ml of serum, and the stability was over 94% after 24 h. Based on the stability evaluation results, it was proved that <sup>64</sup>Cu labelled with the chelate reaction was released on the labelled compound was stable without being decomposed by another metabolism.

### 13. Lipophilicity of <sup>64</sup>Cu-6

$$\log P = \log \frac{\text{concentration dissolved in octanol}}{\text{concentration dissolved in water}}$$

The result of fat-soluble evaluation, <sup>64</sup>Cu-6 showed a partition coefficient value of 0.15. The distribution coefficient values are close to hydrophilicity when the value is negative with respect to 0, and lipophilic when the value is positive. Thus, it was found that the labeled compound synthesized in this study has considerable affinity.

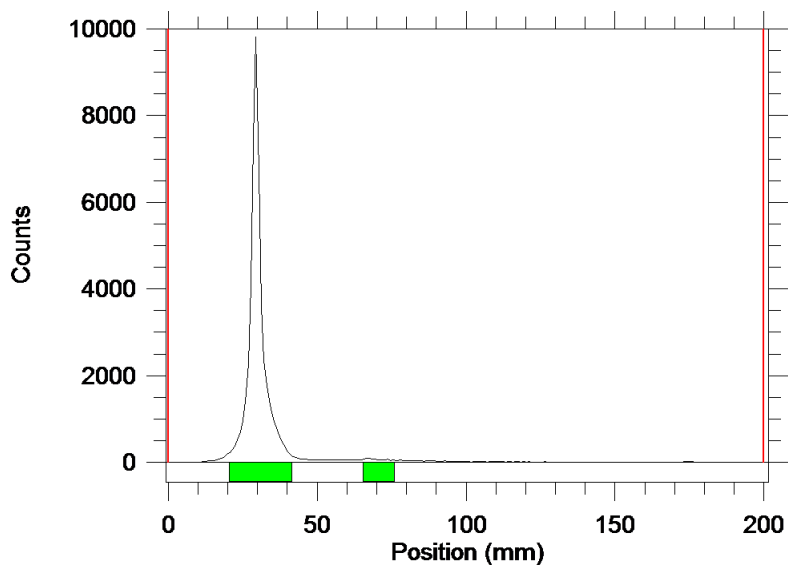

**Figure S1.** Cu-64 labeled data (radio-TLC)

Radiochemical yield: 90%, Radiochemical purity: >98%, Specific activity: 3.7 GBq/ $\mu$ mol

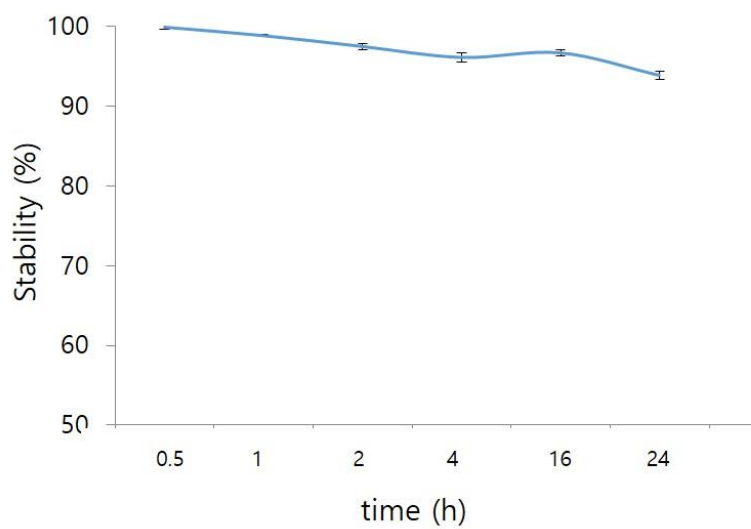

**Figure S2.** Stability of  $^{64}\text{Cu-6}$  in human serum

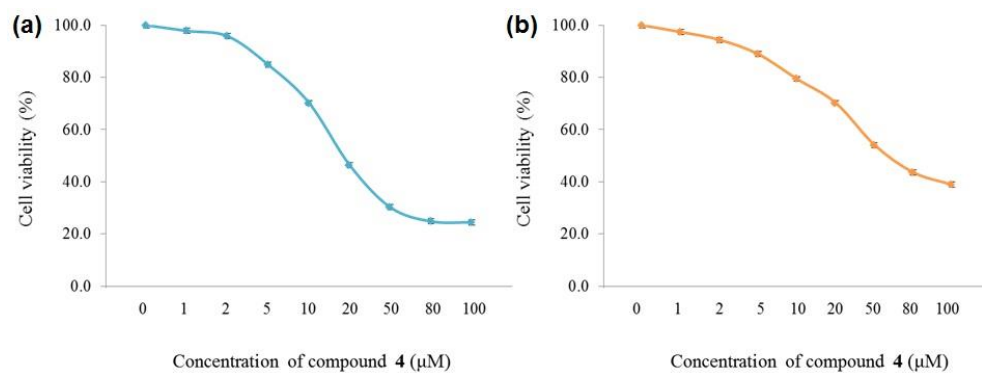

**Figure S3.** Cell viability analysis of compound **4** treated HER2-positive breast cancer cell, SK-BR-3( $IC_{50} = 19 \mu M$ ) (a) and HER2-negative breast cancer cell, MCF-7( $IC_{50} = 62 \mu M$ ) (b).

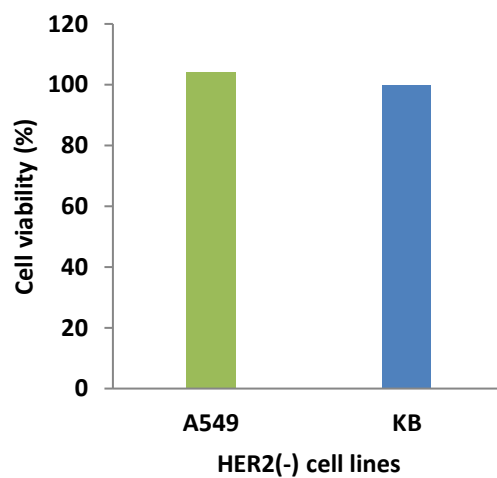

**Figure S4.** Cytotoxicity effect in A549 and KB, HER2(-) cell lines (compound 4 at 50 μM concentration)
